# Supplementary figures and images for: The Novel-Natural-Killer-Cell-Related Gene Signature Predicts the Prognosis and Immune Status of Patients with Hepatocellular Carcinoma
Source: MDPI journal article supplement (doi:10.3390/ijms24119587), 2023-05-31

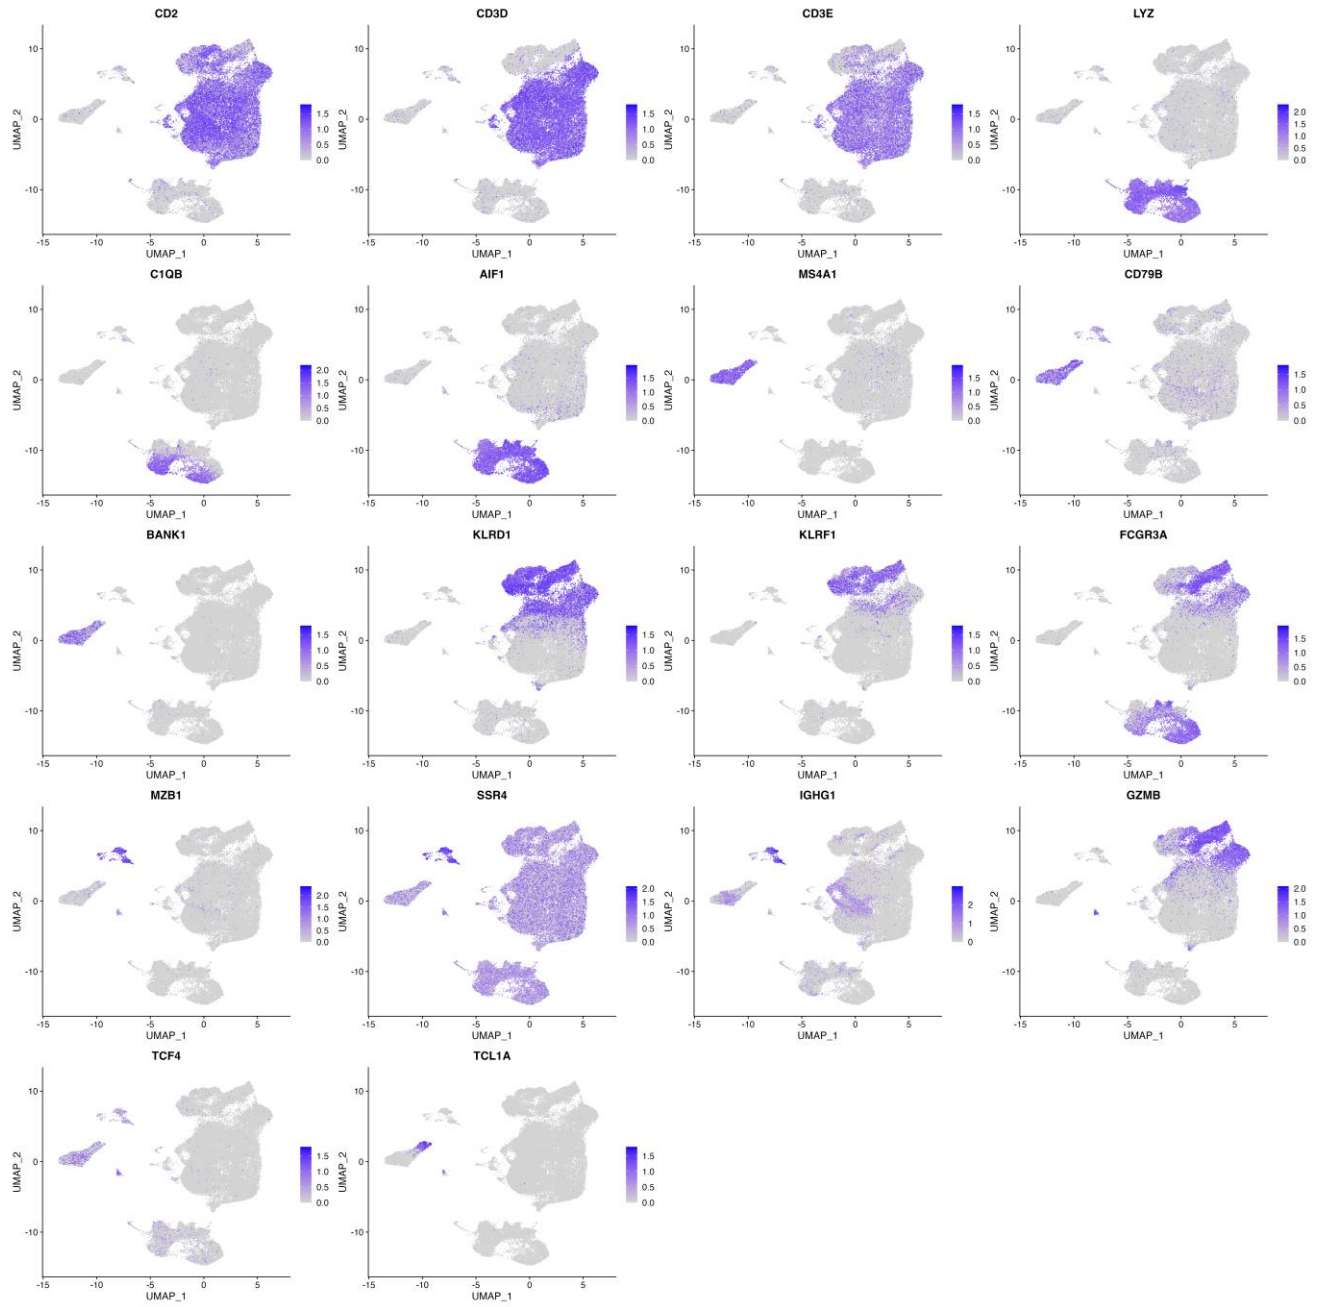

**Figure S1.** Expression profiles of marker genes for cell type definition.

Supplement: s1 [file s1]
